# Supplementary material for: Trace biomarkers associated with spontaneous preterm birth from the maternal serum metabolome of asymptomatic nulliparous women – parallel case-control studies from the SCOPE cohort
Source: PubMed Central journal article supplement (PMC6757051; doi:10.1038/s41598-019-50252-7), 2019-09-23

RESEARCH ARTICLE

**Trace biomarkers associated with spontaneous preterm birth from the maternal serum metabolome of asymptomatic nulliparous women – parallel case-control studies from the SCOPE cohort**

**Authors**

Renato T. Souza, Elizabeth J. McKenzie, Beatrix Jones, Jamie V. de Seymour, Melinda M. Thomas, Erica Zarate, Ting Li Han, Lesley McCowan, Karolina Sulek, Silas Villas-Boas, Louise C. Kenny, José G. Cecatti, Philip N. Baker

a)

**Decane Intensity at 15, 20 weeks**

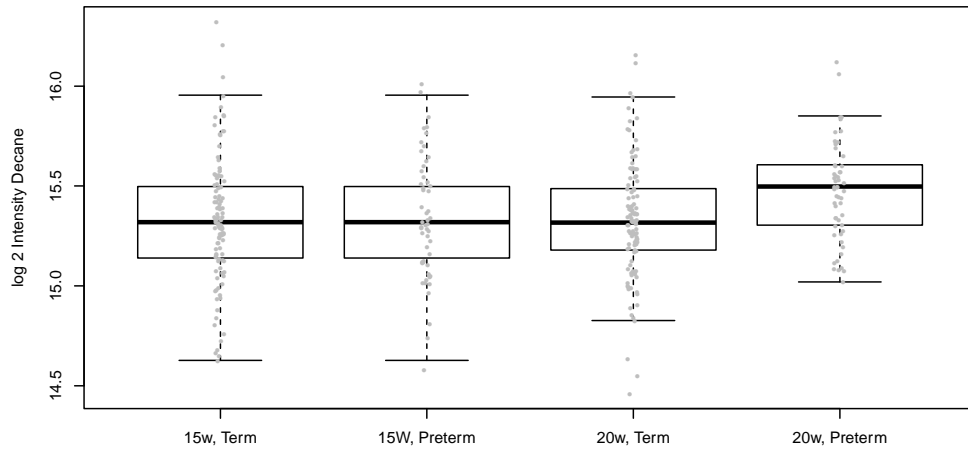

**Dodecane Intensity at 15, 20 weeks**

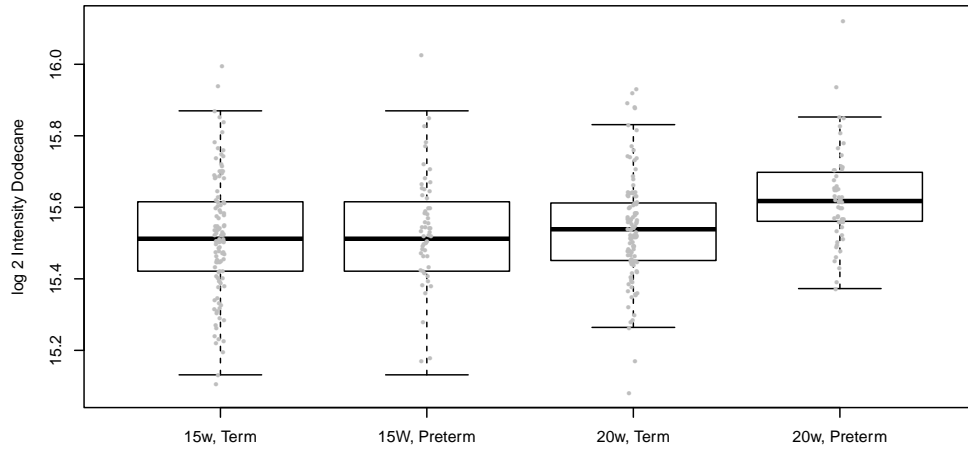

**Undecane Intensity at 15, 20 weeks**

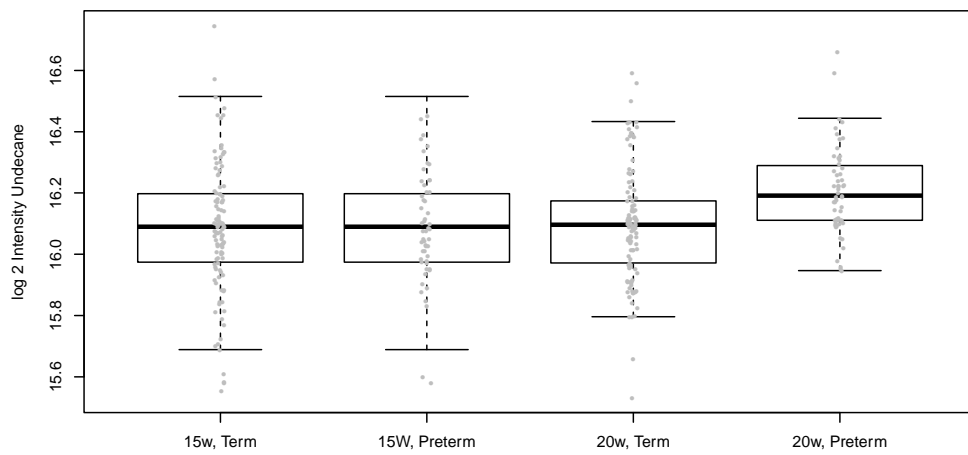

b)

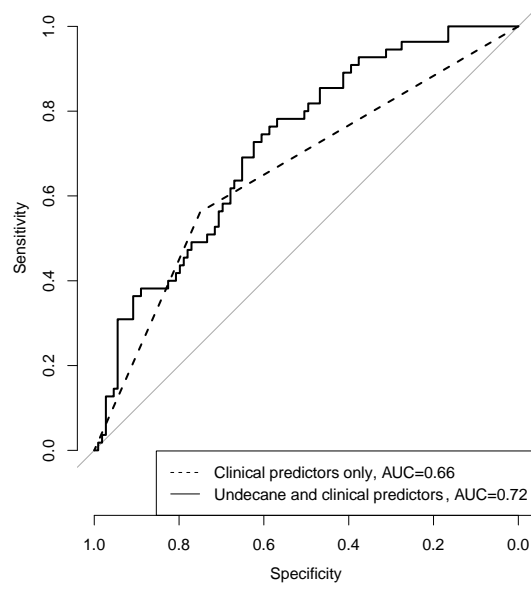

Supplement: 41598_2019_50252_MOESM1_ESM.pdf [file 41598_2019_50252_MOESM1_ESM.pdf]
